# Supplementary material
Source: HighWire-hosted journal article supplement (https://casereports.bmj.com/content/15/7/e249054)

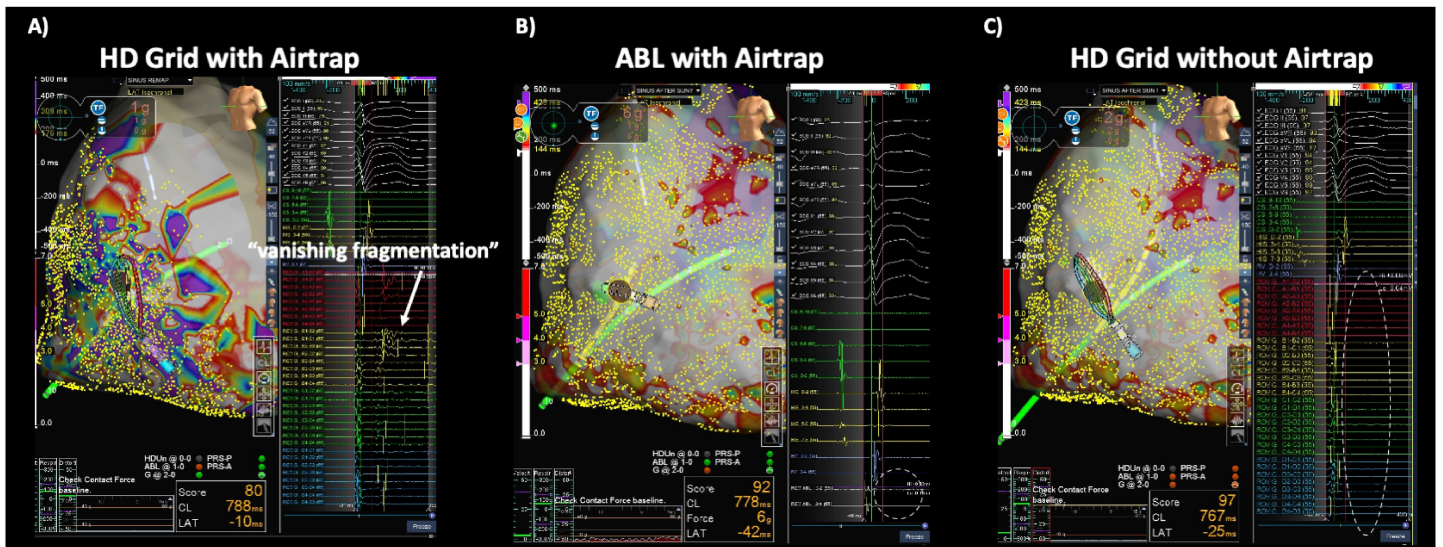

Supplement: inline-supplementary-material-2 [file inline-supplementary-material-2.pdf]
